# Supplementary material for: Accurate prediction of subcellular location of apoptosis proteins combining Chou’s PseAAC and PsePSSM based on wavelet denoising
Source: PubMed Central journal article supplement (PMC5746097; doi:10.18632/oncotarget.22585), 2017-11-21
Supplement: oncotarget-08-107640-s001.pdf [file oncotarget-08-107640-s001.pdf]

## Accurate prediction of subcellular location of apoptosis proteins combining Chou's PseAAC and PsePSSM based on wavelet denoising

### SUPPLEMENTARY MATERIALS

**Supplementary Table 1: Prediction results of subcellular localization of the CL317 dataset by selecting different threshold**

| Thresholds | Wavelet functions  |       |       |       |       |       |       |         |         |         |       |
|------------|--------------------|-------|-------|-------|-------|-------|-------|---------|---------|---------|-------|
|            | Jackknife test (%) |       |       |       |       |       |       |         |         |         |       |
|            | db1                | db4   | db8   | sym3  | sym7  | coif2 | coif4 | bior1.1 | bior2.4 | bior3.3 |       |
| 3          | Default(wv)        | 99.05 | 98.11 | 99.05 | 98.74 | 98.11 | 98.11 | 97.48   | 99.05   | 98.42   | 98.74 |
|            | Default(wp)        | 96.53 | 98.42 | 98.42 | 98.11 | 98.74 | 98.42 | 98.42   | 96.53   | 99.05   | 97.79 |
|            | Birge-Massart      | 99.05 | 97.16 | 99.05 | 97.79 | 97.79 | 97.79 | 98.11   | 99.05   | 98.42   | 98.11 |
| 4          | Default(wv)        | 98.74 | 97.48 | 99.37 | 98.11 | 97.79 | 98.74 | 98.42   | 98.74   | 98.42   | 98.74 |
|            | Default(wp)        | 96.53 | 98.42 | 98.42 | 98.11 | 98.74 | 98.42 | 98.42   | 96.53   | 98.74   | 98.42 |
|            | Birge-Massart      | 95.27 | 98.42 | 99.05 | 97.79 | 98.42 | 97.79 | 98.11   | 95.27   | 98.74   | 98.74 |
| 5          | Default(wv)        | 98.74 | 97.79 | 99.05 | 98.74 | 98.42 | 98.11 | 98.42   | 98.74   | 98.42   | 98.74 |
|            | Default(wp)        | 96.53 | 98.42 | 97.79 | 98.42 | 98.74 | 98.42 | 98.11   | 96.53   | 98.74   | 98.74 |
|            | Birge-Massart      | 81.07 | 98.74 | 98.11 | 98.74 | 97.79 | 97.79 | 98.11   | 81.07   | 98.11   | 98.42 |

'wv' means default threshold obtained by wavelet function.

'wp' means default threshold obtained by wavelet packet function.

**Supplementary Table 2: Prediction results of subcellular localization of ZW225 apoptosis proteins dataset by selecting different threshold**

| Thresholds | Wavelet functions  |       |       |       |       |       |       |         |         |         |       |
|------------|--------------------|-------|-------|-------|-------|-------|-------|---------|---------|---------|-------|
|            | Jackknife test (%) |       |       |       |       |       |       |         |         |         |       |
|            | db1                | db4   | db8   | sym3  | sym7  | coif2 | coif4 | bior1.1 | bior2.4 | bior3.3 |       |
| 3          | Default(wv)        | 98.67 | 98.67 | 100   | 99.11 | 99.11 | 99.56 | 99.56   | 98.67   | 98.22   | 99.11 |
|            | Default(wp)        | 98.67 | 97.78 | 98.22 | 98.22 | 99.11 | 98.67 | 98.22   | 98.67   | 99.11   | 98.22 |
|            | Birge-Massart      | 97.78 | 97.33 | 99.11 | 98.67 | 98.67 | 98.67 | 97.78   | 97.78   | 98.22   | 97.33 |
| 4          | Default(wv)        | 98.22 | 98.67 | 100   | 98.22 | 98.67 | 99.11 | 99.11   | 98.22   | 97.78   | 99.11 |
|            | Default(wp)        | 98.67 | 98.22 | 98.67 | 98.22 | 98.67 | 98.67 | 99.11   | 98.67   | 98.67   | 98.22 |
|            | Birge-Massart      | 89.78 | 98.22 | 99.11 | 98.22 | 99.11 | 99.11 | 98.67   | 89.78   | 99.11   | 98.67 |
| 5          | Default(wv)        | 97.78 | 98.22 | 99.56 | 99.11 | 99.11 | 98.67 | 99.56   | 97.78   | 97.78   | 98.67 |
|            | Default(wp)        | 98.67 | 98.22 | 98.67 | 98.22 | 98.67 | 99.11 | 98.67   | 98.67   | 98.67   | 97.78 |
|            | Birge-Massart      | 92.89 | 98.67 | 98.67 | 98.67 | 98.67 | 98.67 | 98.22   | 92.89   | 98.22   | 98.67 |

'wv' means default threshold obtained by wavelet function;

'wp' means default threshold obtained by wavelet packet function.

**Supplementary Table 3: Prediction results of subcellular localization of the CL317 dataset under different classification algorithms**

| Locations | Classifiers        |       |       |             |       |
|-----------|--------------------|-------|-------|-------------|-------|
|           | Jackknife test (%) |       |       |             |       |
|           | SVM                | KNN   | RF    | Naïve Bayes | DT    |
| Cy        | 100                | 99.11 | 100   | 88.39       | 97.32 |
| Me        | 100                | 100   | 98.18 | 83.64       | 94.55 |
| Mi        | 94.12              | 97.06 | 91.18 | 85.29       | 85.29 |
| Se        | 100                | 100   | 100   | 100         | 94.12 |
| Nu        | 100                | 100   | 94.23 | 84.62       | 90.38 |
| En        | 100                | 97.87 | 100   | 95.74       | 100   |
| OA        | 99.37              | 99.05 | 97.79 | 88.33       | 94.64 |

**Supplementary Table 4: Prediction results of subcellular localization of the ZW225 dataset under different classification algorithms**

| Locations | Classifiers        |        |        |             |        |
|-----------|--------------------|--------|--------|-------------|--------|
|           | Jackknife test (%) |        |        |             |        |
|           | SVM                | KNN    | RF     | Naïve Bayes | DT     |
| Cy        | 100                | 100    | 100    | 100         | 100    |
| Me        | 100                | 98.88  | 98.88  | 85.39       | 97.75  |
| Mi        | 100                | 76.00  | 96.00  | 96.00       | 92.00  |
| Nu        | 100                | 100.00 | 100.00 | 100.00      | 100.00 |
| OA        | 100                | 96.89  | 99.11  | 93.78       | 98.22  |
